# Supplementary material for: Atg5flox-Derived Autophagy-Deficient Model of Pompe Disease: Does It Tell the Whole Story?
Source: PubMed Central journal article supplement (PMC5640697; doi:10.1016/j.omtm.2017.08.002), 2017-09-22
Supplement: mmc1.pdf [file mmc1.pdf]

**OMTM, Volume 7**

**Supplemental Information**

**Atg5<sup>flox</sup>-Derived Autophagy-**

**Deficient Model of Pompe**

**Disease: Does It Tell**

**the Whole Story?**

**Jeong-A Lim, Hossein Zare, Rosa Puertollano, and Nina Raben**

## Supplemental Information

| Gene | Atg5 DKO (RPKM) |       |       |      | Atg7 DKO (RPKM) |       |       |      |       |       | Average (RPKM) |          | p           | FC<br>(Atg7DKO/Atg5DKO) |
|------|-----------------|-------|-------|------|-----------------|-------|-------|------|-------|-------|----------------|----------|-------------|-------------------------|
|      | 1               | 2     | 3     | 4    | 1               | 2     | 3     | 4    | 5     | 6     | Atg5 DKO       | Atg7 DKO |             |                         |
| Atg5 | 11.46           | 10.56 | 10.71 | 8.49 | 11.58           | 10.63 | 10.67 | 9.41 | 13.76 | 13.66 | 10.31          | 11.62    | 0.2397      | 1.13                    |
| Atg7 | 4.28            | 4.01  | 4.01  | 4.61 | 0.51            | 0.52  | 0.40  | 0.61 | 0.75  | 0.51  | 4.23           | 0.55     | 2.36561E-09 | 0.15                    |

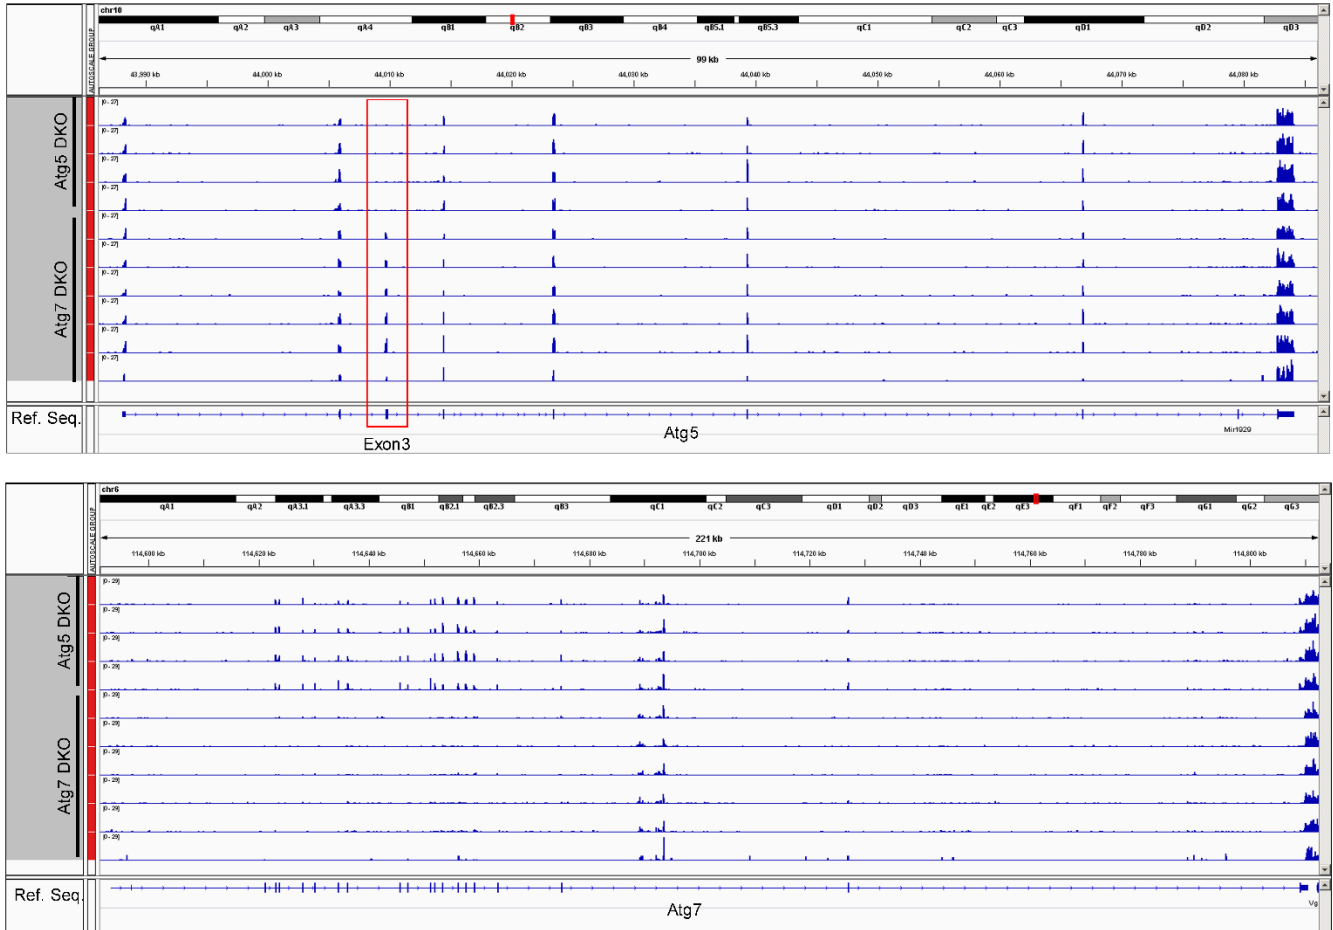

**Figure S1.** Visualization of RNA-seq coverage across the Atg5 (top) and Atg7 (bottom) genes. Expressed exons are seen as peaks, and are consistent with RefSeq mouse genome annotation. Note lack of reads corresponding to exon 3 of the Atg5 gene in all 4 samples from Atg5 DKO. The values on the top table for Atg5 and Atg7 represent RPKM (Reads Per Kilobase of transcript per Million mapped reads). The raw sequencing datasets are available upon request.

**Table S1.** GO terms for the most significantly upregulated genes in muscle from Atg5 DKO ( $\geq 2$ -fold) compared to WT, GAA-KO, and Atg7 DKO.

| Gene     | Average (RPKM) |          | p-value     | FC<br>(Atg5DKO/Atg7DKO) |
|----------|----------------|----------|-------------|-------------------------|
|          | Atg5 DKO       | Atg7 DKO |             |                         |
| Mir3101  | 59.84          | 0.00     | 0.000691593 | N/A                     |
| Arhgap21 | 3.34           | 0.00     | 8.77409E-11 | N/A                     |
| Hal      | 1.50           | 0.03     | 5.76272E-06 | 54.61                   |
| Chia     | 1.14           | 0.02     | 0.000324877 | 46.25                   |
| Abhd1    | 3.35           | 0.28     | 8.57784E-05 | 12.04                   |
| Flywch2  | 3.38           | 0.30     | 0.000257637 | 11.45                   |
| Golm1    | 5.34           | 0.52     | 0.009501052 | 10.20                   |
| Park2    | 21.85          | 4.50     | 2.14812E-07 | 4.86                    |
| BC048679 | 12.04          | 2.64     | 0.00442623  | 4.55                    |
| Nnat     | 6.42           | 1.49     | 0.000262458 | 4.31                    |
| Fibin    | 17.38          | 5.26     | 0.000217099 | 3.30                    |
| Asns     | 44.52          | 13.95    | 8.18065E-05 | 3.19                    |
| Fos      | 11.38          | 4.44     | 0.017088314 | 2.56                    |
| Wnt5b    | 3.31           | 1.33     | 7.09606E-05 | 2.48                    |
| Car4     | 4.50           | 1.92     | 0.008870785 | 2.35                    |
| Acot2    | 36.24          | 16.18    | 0.03327828  | 2.24                    |
| Apold1   | 3.01           | 1.40     | 0.014157153 | 2.15                    |
| Nt5dc2   | 1.20           | 0.53     | 0.004442646 | 2.27                    |
| Dysf     | 32.00          | 15.59    | 9.8555E-06  | 2.05                    |
| Slc25a34 | 14.46          | 7.12     | 0.023259494 | 2.03                    |

| Category                | Term       | Description                           | LogP    | Symbols            |
|-------------------------|------------|---------------------------------------|---------|--------------------|
| GO Biological Processes | GO:0009636 | response to toxic substance           | -3.1985 | ASNS,FOS,PRKN      |
| GO Biological Processes | GO:0050708 | regulation of protein secretion       | -2.5035 | NNAT,PRKN,CHIA     |
| GO Biological Processes | GO:0032787 | monocarboxylic acid metabolic process | -2.0432 | ASNS,HAL,ACOT2     |
| GO Biological Processes | GO:0010256 | endomembrane system organization      | -2.0180 | PRKN,DYSF,ARHGAP21 |

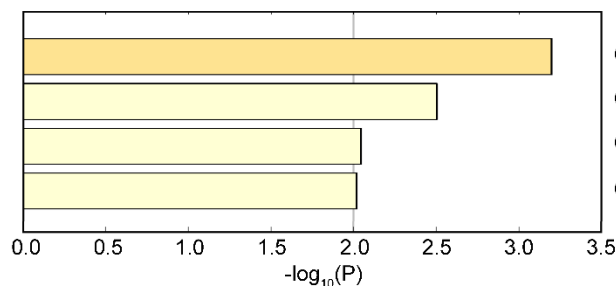

GO:0009636 response to toxic substance  
 GO:0050708 regulation of protein secretion  
 GO:0032787 monocarboxylic acid metabolic process  
 GO:0010256 endomembrane system organization

Biological Process Ontology highlighted a set of genes which are upregulated in response to toxic substances. GO analysis was performed with Metascape 1.0 (<http://metascape.org>) (P-value <0.01).

**List of primers for the RT-PCR amplification:**

P1 (Atg5 exon 2s): GATGACAAAGATGTGCTTCGAGAT

P2 (Atg5 exon 5as): GACATAAAGTGAGCCTCAACCGCAT

P3 (Atg5 exon3/5 junction-as): GTCCTTTTCTGGAAAACATTTCA

P4 (Atg5 exon2/4 junction – as): CCAATTGGATAATGCATAGTAT
